# Supplementary material for: Higher Expression of Denervation-responsive Genes is Negatively Associated with Muscle Volume and Performance Traits in the Study of Muscle, Mobility and Aging (SOMMA)
Source: bioRxiv or medRxiv preprint supplement (doi:10.1101/2023.11.04.23298090), 2023-11-05
Supplement: Supplementary file [file media-2.pdf]

**Supplemental Table 2. Genes with which SOMMA traits had a negative association.**

| Gene Name | Localization                                                                                                                                                                                      | Citations                                                                                                                                                                                                |
|-----------|---------------------------------------------------------------------------------------------------------------------------------------------------------------------------------------------------|----------------------------------------------------------------------------------------------------------------------------------------------------------------------------------------------------------|
| CDH15     | A calcium-dependent intercellular adhesion glycoprotein found on muscle fiber side of adult neuromuscular junction                                                                                | 1. <a href="https://pubmed.ncbi.nlm.nih.gov/8921257/">https://pubmed.ncbi.nlm.nih.gov/8921257/</a><br>2. <a href="https://pubmed.ncbi.nlm.nih.gov/9638336/">https://pubmed.ncbi.nlm.nih.gov/9638336/</a> |
| THBS4     | Matricellular protein found at adult neuromuscular junction                                                                                                                                       | 1. <a href="https://pubmed.ncbi.nlm.nih.gov/7490284/">https://pubmed.ncbi.nlm.nih.gov/7490284/</a>                                                                                                       |
| CHRND     | Delta subunit of acetylcholine receptor found on muscle fiber side of adult neuromuscular junction                                                                                                | 1. <a href="https://pubmed.ncbi.nlm.nih.gov/1646821/">https://pubmed.ncbi.nlm.nih.gov/1646821/</a><br>2. <a href="https://pubmed.ncbi.nlm.nih.gov/8300573/">https://pubmed.ncbi.nlm.nih.gov/8300573/</a> |
| CHRNA1    | Alpha subunit of acetylcholine receptor found on muscle fiber side of adult neuromuscular junction                                                                                                | 1. <a href="https://pubmed.ncbi.nlm.nih.gov/1646821/">https://pubmed.ncbi.nlm.nih.gov/1646821/</a><br>2. <a href="https://pubmed.ncbi.nlm.nih.gov/8300573/">https://pubmed.ncbi.nlm.nih.gov/8300573/</a> |
| CHRNE     | Epsilon subunit of acetylcholine receptor found on muscle fiber side of adult neuromuscular junction                                                                                              | 1. <a href="https://pubmed.ncbi.nlm.nih.gov/1646821/">https://pubmed.ncbi.nlm.nih.gov/1646821/</a><br>2. <a href="https://pubmed.ncbi.nlm.nih.gov/8300573/">https://pubmed.ncbi.nlm.nih.gov/8300573/</a> |
| NCAM1     | Glycoprotein found on both muscle fiber and axonal sides of neuromuscular junction                                                                                                                | 1. <a href="https://pubmed.ncbi.nlm.nih.gov/29175953/">https://pubmed.ncbi.nlm.nih.gov/29175953/</a>                                                                                                     |
| RUNX1     | Transcription factor found in myonuclei                                                                                                                                                           | 1. <a href="https://pubmed.ncbi.nlm.nih.gov/16024660/">https://pubmed.ncbi.nlm.nih.gov/16024660/</a>                                                                                                     |
| NEFM      | A neurofilament protein typically found in axons. Gene has very low baseline expression in skeletal muscle and protein is not detected.                                                           | 1. <a href="https://www.proteinatlas.org/ENSG00000104722-NEFM/tissue">https://www.proteinatlas.org/ENSG00000104722-NEFM/tissue</a>                                                                       |
| CAV3      | The primary protein structural component of caveolae in skeletal muscle.                                                                                                                          | 1. <a href="https://www.nature.com/articles/ejhg2009103">https://www.nature.com/articles/ejhg2009103</a>                                                                                                 |
| SCN5A     | A sodium channel that is constitutively expressed in adult heart, and although expressed in neonatal skeletal muscle, is typically not expressed in adult skeletal muscle except when denervated. | 1. <a href="https://pubmed.ncbi.nlm.nih.gov/2155010/">https://pubmed.ncbi.nlm.nih.gov/2155010/</a><br>2. <a href="https://pubmed.ncbi.nlm.nih.gov/1654949/">https://pubmed.ncbi.nlm.nih.gov/1654949/</a> |
| SCN4A     | A sodium channel that is expressed in adult skeletal muscle.                                                                                                                                      | 1. <a href="https://pubmed.ncbi.nlm.nih.gov/2155010/">https://pubmed.ncbi.nlm.nih.gov/2155010/</a><br>2. <a href="https://pubmed.ncbi.nlm.nih.gov/1654949/">https://pubmed.ncbi.nlm.nih.gov/1654949/</a> |
| MYOG      | A transcription factor that regulates aspects of muscle regeneration, as well as regulating expression of                                                                                         | 1. <a href="https://pubmed.ncbi.nlm.nih.gov/20887891/">https://pubmed.ncbi.nlm.nih.gov/20887891/</a>                                                                                                     |

|          |                                                                                                                                                                                 |                                                                                                                                                                                                                                                                      |
|----------|---------------------------------------------------------------------------------------------------------------------------------------------------------------------------------|----------------------------------------------------------------------------------------------------------------------------------------------------------------------------------------------------------------------------------------------------------------------|
|          | ubiquitin ligases (e.g., atrogin-1/MAFbx) with denervation                                                                                                                      |                                                                                                                                                                                                                                                                      |
| GADD45A  | Transcription factor that is upregulated in muscle atrophy conditions that include denervation                                                                                  | <ol style="list-style-type: none"> <li>1. <a href="https://pubmed.ncbi.nlm.nih.gov/22692209/">https://pubmed.ncbi.nlm.nih.gov/22692209/</a></li> <li>2. <a href="https://pubmed.ncbi.nlm.nih.gov/23941879/">https://pubmed.ncbi.nlm.nih.gov/23941879/</a></li> </ol> |
| EFNA2    | Membrane bound protein whose expression increases in injured Schwann cells                                                                                                      | <ol style="list-style-type: none"> <li>1. <a href="https://pubmed.ncbi.nlm.nih.gov/32349983/">https://pubmed.ncbi.nlm.nih.gov/32349983/</a></li> </ol>                                                                                                               |
| CDK5R1   | Receptor for the kinase cdk5 expressed in muscle satellite cells                                                                                                                | <ol style="list-style-type: none"> <li>1. <a href="https://pubmed.ncbi.nlm.nih.gov/28733456/">https://pubmed.ncbi.nlm.nih.gov/28733456/</a></li> </ol>                                                                                                               |
| MUSK     | Muscle Specific Kinase found in skeletal muscle membrane and responsible for recruiting proteins to subsynaptic region to anchor acetylcholine receptors to actin cytoskeleton. | <ol style="list-style-type: none"> <li>1. <a href="https://pubmed.ncbi.nlm.nih.gov/21255125/">https://pubmed.ncbi.nlm.nih.gov/21255125/</a></li> <li>2. <a href="https://pubmed.ncbi.nlm.nih.gov/20974278/">https://pubmed.ncbi.nlm.nih.gov/20974278/</a></li> </ol> |
| RAPSN    | A protein that helps anchor acetylcholine receptors to actin cytoskeleton at neuromuscular junction.                                                                            | <ol style="list-style-type: none"> <li>1. <a href="https://pubmed.ncbi.nlm.nih.gov/32344108/">https://pubmed.ncbi.nlm.nih.gov/32344108/</a></li> </ol>                                                                                                               |
| KCNC3    | A potassium channel found in various tissues that include skeletal muscle.                                                                                                      | <ol style="list-style-type: none"> <li>1. <a href="https://www.proteinatlas.org/ENSG00000131398-KCNC3/tissue#rna_expression">https://www.proteinatlas.org/ENSG00000131398-KCNC3/tissue#rna_expression</a></li> </ol>                                                 |
| SERPINE2 | Serine protease inhibitor. Gene is expressed in skeletal muscle but protein not detected.                                                                                       | <ol style="list-style-type: none"> <li>1. <a href="https://www.proteinatlas.org/ENSG00000135919-SERPINE2/tissue">https://www.proteinatlas.org/ENSG00000135919-SERPINE2/tissue</a></li> </ol>                                                                         |
| NRG1     | Growth factor implicated in regulating acetylcholine receptor number at neuromuscular junction                                                                                  | <ol style="list-style-type: none"> <li>1. <a href="https://www.ncbi.nlm.nih.gov/pmc/articles/PMC5864756/">https://www.ncbi.nlm.nih.gov/pmc/articles/PMC5864756/</a></li> </ol>                                                                                       |
| P2RX7    | Purinergic receptor involved in formation and function of the neuromuscular junction.                                                                                           | <ol style="list-style-type: none"> <li>1. <a href="https://www.mdpi.com/1422-0067/24/11/9434">https://www.mdpi.com/1422-0067/24/11/9434</a></li> </ol>                                                                                                               |
| DES      | An intermediate filament protein linking contractile proteins to the sarcolemma and organelles.                                                                                 | <ol style="list-style-type: none"> <li>1. <a href="https://pubmed.ncbi.nlm.nih.gov/33825342/">https://pubmed.ncbi.nlm.nih.gov/33825342/</a></li> </ol>                                                                                                               |
