# Supplementary material for: Higher Expression of Denervation-responsive Genes is Negatively Associated with Muscle Volume and Performance Traits in the Study of Muscle, Mobility and Aging (SOMMA)
Source: bioRxiv or medRxiv preprint supplement (doi:10.1101/2023.11.04.23298090), 2023-11-05
Supplement: Supplementary file [file media-3.pdf]

**Supplemental Table 3. Genes with which SOMMA traits had a positive association.**

| Gene Name | Localization of protein                                                                                                                                         | Citations                                                                                                                                                                                                                                                                                                            |
|-----------|-----------------------------------------------------------------------------------------------------------------------------------------------------------------|----------------------------------------------------------------------------------------------------------------------------------------------------------------------------------------------------------------------------------------------------------------------------------------------------------------------|
| UTRN      | A protein structurally and functionally similar to dystrophin expressed primarily in neuromuscular and myotendinous junctions.                                  | 1. <a href="https://pubmed.ncbi.nlm.nih.gov/24879867/">https://pubmed.ncbi.nlm.nih.gov/24879867/</a><br>2. <a href="https://www.ncbi.nlm.nih.gov/gene/7402">https://www.ncbi.nlm.nih.gov/gene/7402</a><br>3. <a href="https://pubmed.ncbi.nlm.nih.gov/10446253/">https://pubmed.ncbi.nlm.nih.gov/10446253/</a>       |
| F2R       | A coagulation factor expressed in osteoclasts and skeletal muscle in response to exercise.                                                                      | 1. <a href="https://pubmed.ncbi.nlm.nih.gov/28377874">https://pubmed.ncbi.nlm.nih.gov/28377874</a><br>2. <a href="https://pubmed.ncbi.nlm.nih.gov/32226307/">https://pubmed.ncbi.nlm.nih.gov/32226307/</a>                                                                                                           |
| APP       | A transmembrane protein expressed at both the pre and post-synaptic sides of the NMJ.                                                                           | 1. <a href="https://pubmed.ncbi.nlm.nih.gov/37175515/">https://pubmed.ncbi.nlm.nih.gov/37175515/</a><br>2. <a href="https://pubmed.ncbi.nlm.nih.gov/15689559/">https://pubmed.ncbi.nlm.nih.gov/15689559/</a>                                                                                                         |
| AKAP1     | A scaffolding protein found in the mitochondria.                                                                                                                | 1. <a href="https://pubmed.ncbi.nlm.nih.gov/26437602/">https://pubmed.ncbi.nlm.nih.gov/26437602/</a><br>2. <a href="https://pubmed.ncbi.nlm.nih.gov/26610411/">https://pubmed.ncbi.nlm.nih.gov/26610411/</a>                                                                                                         |
| SPOCK1    | A proteoglycan predominately expressed in axons and Schwann cells in adults. Gene expressed in muscle but protein not detected.                                 | 1. <a href="https://pubmed.ncbi.nlm.nih.gov/10842087/">https://pubmed.ncbi.nlm.nih.gov/10842087/</a><br>2. <a href="https://www.proteinatlas.org/ENSG00000152377-SPOCK1/tissue">https://www.proteinatlas.org/ENSG00000152377-SPOCK1/tissue</a>                                                                       |
| MYH9      | A non-muscle myosin found in cytoplasm assisting in cytoskeleton maintenance.                                                                                   | 1. <a href="https://pubmed.ncbi.nlm.nih.gov/29679756/">https://pubmed.ncbi.nlm.nih.gov/29679756/</a>                                                                                                                                                                                                                 |
| AGRN      | Proteoglycan found in the basal lamina of the NMJ in both skeletal muscle and alpha motor neurons.                                                              | 1. <a href="https://pubmed.ncbi.nlm.nih.gov/28846617/">https://pubmed.ncbi.nlm.nih.gov/28846617/</a><br>2. <a href="https://pubmed.ncbi.nlm.nih.gov/12798796/">https://pubmed.ncbi.nlm.nih.gov/12798796/</a>                                                                                                         |
| SV2A      | Synaptic vesicle protein found in the nerve terminals of type I and smaller IIa fibers. Although gene is expressed in skeletal muscle, protein is not detected. | 1. <a href="https://pubmed.ncbi.nlm.nih.gov/20843861/">https://pubmed.ncbi.nlm.nih.gov/20843861/</a><br>2. <a href="https://www.proteinatlas.org/ENSG00000159164-SV2A/tissue">https://www.proteinatlas.org/ENSG00000159164-SV2A/tissue</a>                                                                           |
| LRP4      | Agrin receptor found in the skeletal muscle membrane at NMJ.                                                                                                    | 1. <a href="https://www.ncbi.nlm.nih.gov/pmc/articles/PMC7759742/pdf/fnagi-12-597811.pdf">https://www.ncbi.nlm.nih.gov/pmc/articles/PMC7759742/pdf/fnagi-12-597811.pdf</a>                                                                                                                                           |
| CDK5      | A kinase concentrated at the neuromuscular synapse.                                                                                                             | 1. <a href="https://pubmed.ncbi.nlm.nih.gov/11276227/">https://pubmed.ncbi.nlm.nih.gov/11276227/</a>                                                                                                                                                                                                                 |
| THBS4     | An adhesive glycoprotein that is a member of thrombospondin protein                                                                                             | 1. <a href="https://pubmed.ncbi.nlm.nih.gov/37582915/">https://pubmed.ncbi.nlm.nih.gov/37582915/</a><br>2. <a href="https://pubmed.ncbi.nlm.nih.gov/24589453/">https://pubmed.ncbi.nlm.nih.gov/24589453/</a><br>3. <a href="https://pubmed.ncbi.nlm.nih.gov/27669143/">https://pubmed.ncbi.nlm.nih.gov/27669143/</a> |

|       |                                                                                                                                                         |                                                                                                                                                                                                                                                                                                                                                                                                                                                                                                                |
|-------|---------------------------------------------------------------------------------------------------------------------------------------------------------|----------------------------------------------------------------------------------------------------------------------------------------------------------------------------------------------------------------------------------------------------------------------------------------------------------------------------------------------------------------------------------------------------------------------------------------------------------------------------------------------------------------|
|       | family. Stabilizes muscle membranes.                                                                                                                    |                                                                                                                                                                                                                                                                                                                                                                                                                                                                                                                |
| PSEN1 | A protein needed for normal neurogenesis and may have anti-apoptotic activity.                                                                          | <ol style="list-style-type: none"> <li>1. <a href="https://www.ncbi.nlm.nih.gov/pmc/articles/PMC9504248/pdf/ijms-23-10970.pdf">https://www.ncbi.nlm.nih.gov/pmc/articles/PMC9504248/pdf/ijms-23-10970.pdf</a></li> <li>2. <a href="https://www.ncbi.nlm.nih.gov/pmc/articles/PMC10179041/">https://www.ncbi.nlm.nih.gov/pmc/articles/PMC10179041/</a></li> <li>3. <a href="https://www.proteinatlas.org/ENSG00000080815-PSEN1/tissue">https://www.proteinatlas.org/ENSG00000080815-PSEN1/tissue</a></li> </ol> |
| EPHA7 | A juxtacrine signaling receptor concentrated in the post-synaptic membrane of muscle fibers and promotes muscle differentiation.                        | <ol style="list-style-type: none"> <li>1. <a href="https://pubmed.ncbi.nlm.nih.gov/11414792/">https://pubmed.ncbi.nlm.nih.gov/11414792/</a></li> <li>2. <a href="https://pubmed.ncbi.nlm.nih.gov/32314958/">https://pubmed.ncbi.nlm.nih.gov/32314958/</a></li> </ol>                                                                                                                                                                                                                                           |
| KCNC3 | Potassium channel expressed in various CNS neurons, especially purkinje cells, with lower expression in skeletal muscle.                                | <ol style="list-style-type: none"> <li>1. <a href="https://pubmed.ncbi.nlm.nih.gov/18448641/">https://pubmed.ncbi.nlm.nih.gov/18448641/</a></li> <li>2. <a href="https://pubmed.ncbi.nlm.nih.gov/34820911/">https://pubmed.ncbi.nlm.nih.gov/34820911/</a></li> <li>3. <a href="https://www.proteinatlas.org/ENSG00000131398-KCNC3/tissue">https://www.proteinatlas.org/ENSG00000131398-KCNC3/tissue</a></li> </ol>                                                                                             |
| EPHA4 | An ephrin receptor concentrated in the post-synaptic membrane of muscle fibers that is implicated in formation and stability of neuromuscular junction. | <ol style="list-style-type: none"> <li>1. <a href="https://pubmed.ncbi.nlm.nih.gov/11414792/">https://pubmed.ncbi.nlm.nih.gov/11414792/</a></li> <li>2. <a href="https://pubmed.ncbi.nlm.nih.gov/14729671/">https://pubmed.ncbi.nlm.nih.gov/14729671/</a></li> </ol>                                                                                                                                                                                                                                           |
| MYH10 | A non-muscle myosin isoform. Gene is expressed in skeletal muscle but protein is not detected.                                                          | <ol style="list-style-type: none"> <li>1. <a href="https://pubmed.ncbi.nlm.nih.gov/22677128/">https://pubmed.ncbi.nlm.nih.gov/22677128/</a></li> <li>2. <a href="https://pubmed.ncbi.nlm.nih.gov/36849436/">https://pubmed.ncbi.nlm.nih.gov/36849436/</a></li> <li>3. <a href="https://www.proteinatlas.org/ENSG00000133026-MYH10/tissue">https://www.proteinatlas.org/ENSG00000133026-MYH10/tissue</a></li> </ol>                                                                                             |
